# Supplementary material for: Phonon thermal transport in Bi2Te3/Sb2Te3 monolayer superlattices: a neural network potential study
Source: Royal Society of Chemistry journal article supplement (doi:10.1039/d4nr04968c), 2024-12-27
Supplement: d4nr04968c1.pdf [file d4nr04968c1.pdf]

Supplemental Materials for

**Phonon thermal transport in  $\text{Bi}_2\text{Te}_3/\text{Sb}_2\text{Te}_3$  monolayer  
superlattice: a neural network potential study**

Pan Zhang,<sup>a,b</sup> Fang Lyv,<sup>b</sup> Dan Jin,<sup>b</sup> Zhenhua Zhang,<sup>c</sup> Shiwei Chen,<sup>a</sup> Yong Liu,<sup>b</sup> Ziyu

Wang,<sup>b</sup> Zhihong Lu,<sup>c</sup> Shiheng Liang <sup>\*a</sup> and Rui Xiong <sup>\*b</sup>

a. School of Physics, Hubei University, Wuhan 430062, People's Republic of China

b. Key Laboratory of Artificial Micro- and Nano-structures of Ministry of  
Education, School of Physics and Technology, Wuhan University, Wuhan

430072, People's Republic of China

c. The State Key Laboratory of Refractories and Metallurgy, School of Materials

Science and Engineering, Wuhan University of Science and Technology, Wuhan

430081, People's Republic of China

Corresponding author: [Shihengliang@hubu.edu.cn](mailto:Shihengliang@hubu.edu.cn)

Corresponding author: [xiongrui@whu.edu.cn](mailto:xiongrui@whu.edu.cn)

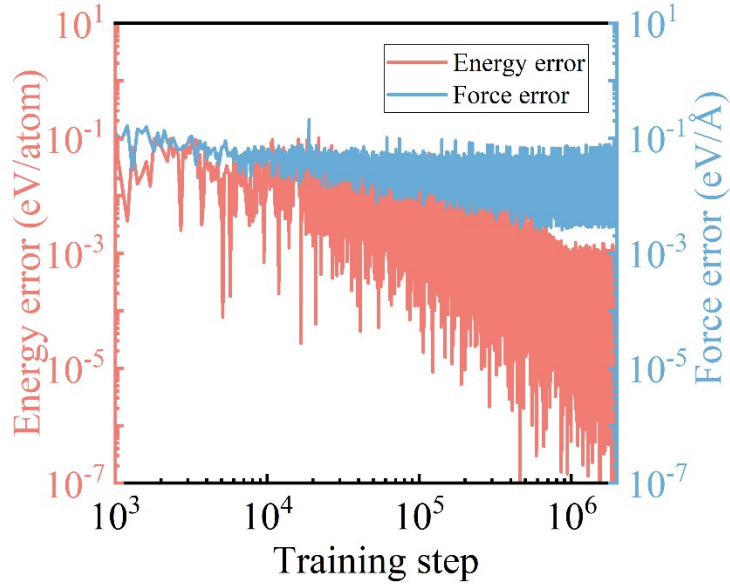

**Fig. S1** The loss functions of energy and force during training process.

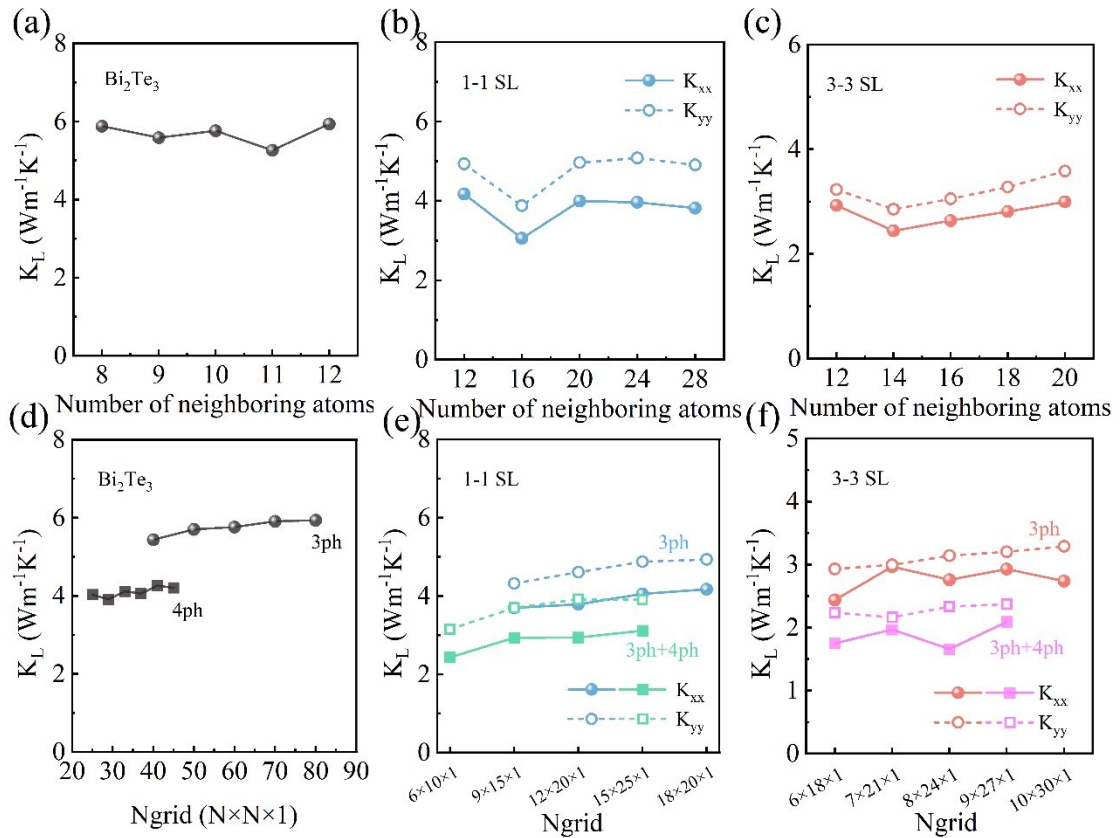

**Fig. S2** Convergence tests of (a-c) number of neighboring atoms and (d-f) q-mesh in the Brillouin zone for solving phonon Boltzmann transport equation in the calculation of lattice thermal conductivity of  $\text{Bi}_2\text{Te}_3$  monolayer, 1-1 and 3-3  $\text{Bi}_2\text{Te}_3/\text{Sb}_2\text{Te}_3$  monolayer superlattices. The 12th neighboring atoms are chosen for the three-order

interatomic force constants calculations.  $80 \times 80 \times 1$  and  $45 \times 45 \times 1$  q-meshes are used to calculate thermal conductivity of  $\text{Bi}_2\text{Te}_3$  monolayer, while  $18 \times 30 \times 1$  and  $15 \times 25 \times 1$  q-meshes are used for 1-1  $\text{Bi}_2\text{Te}_3/\text{Sb}_2\text{Te}_3$  monolayer superlattice, and  $9 \times 27 \times 1$  and  $7 \times 21 \times 1$  q-meshes are used for 3-3  $\text{Bi}_2\text{Te}_3/\text{Sb}_2\text{Te}_3$  monolayer superlattice, when only three-phonon scattering processes and both three-phonon and four-phonon scattering processes are being considered, respectively, to obtain convergent results.

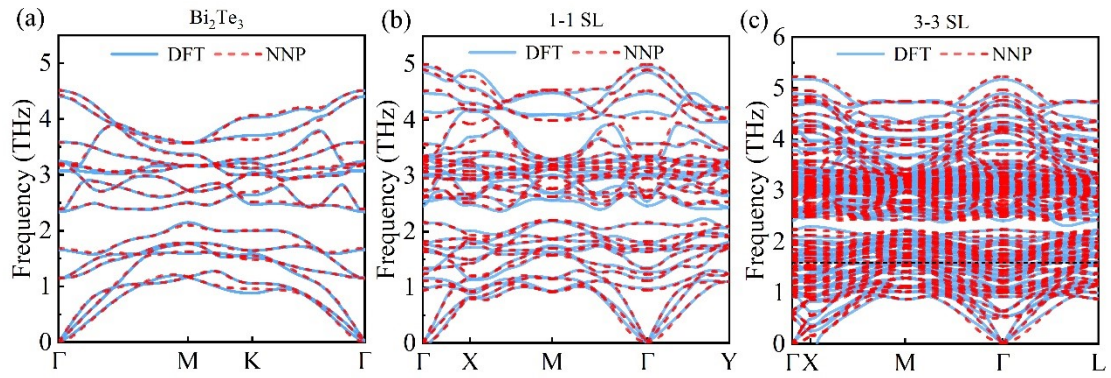

**Fig. S3** (a) The phonon dispersions of (a)  $\text{Bi}_2\text{Te}_3$  monolayer, (b) 1-1 and (c) 3-3  $\text{Bi}_2\text{Te}_3/\text{Sb}_2\text{Te}_3$  monolayer superlattices calculated using DFT and NNP, respectively.

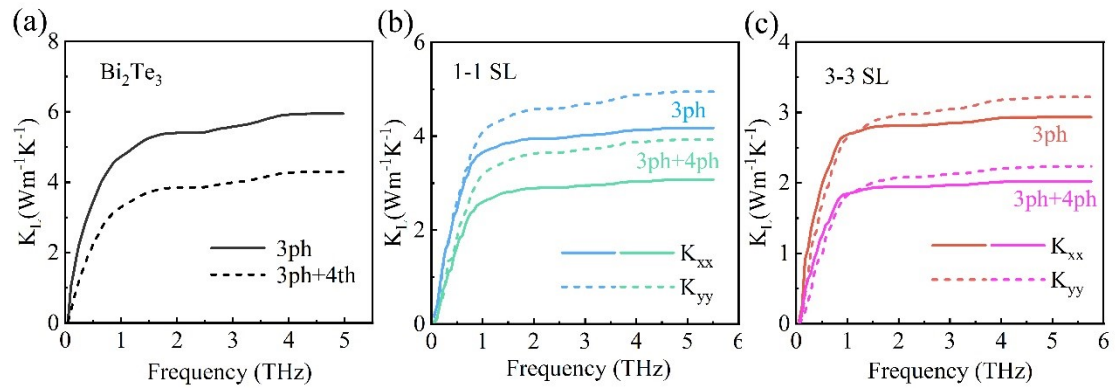

**Fig. S4** (a) The cumulative lattice thermal conductivities at 300 K of (a)  $\text{Bi}_2\text{Te}_3$  monolayer, (b) 1-1 and (c) 3-3  $\text{Bi}_2\text{Te}_3/\text{Sb}_2\text{Te}_3$  monolayer superlattices, respectively.
